# Supplementary material for: The RNF168 paralog RNF169 defines a new class of ubiquitylated histone reader involved in the response to DNA damage
Source: eLife journal article supplement (doi:10.7554/elife.23872), 2017-04-13

CS (Ubq-MIU)  
NOEs (Ubq-MIU)  
contacts (RNF169-NCP)

CoM (RNF169-NCP)

*Replica averaging*

*Simulated annealing*

*Starting model*

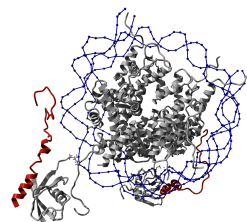

300 K, 75 ns

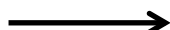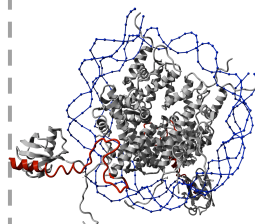

300 K, 200 ns

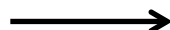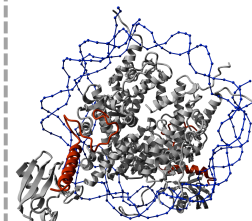

300 K, 200 ns

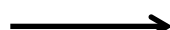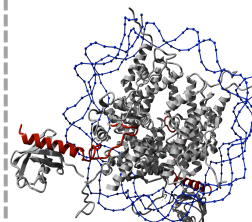

300 K, 200 ns

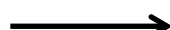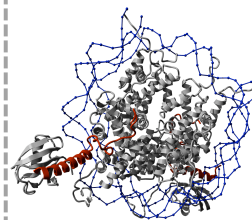

300 K, 200 ns

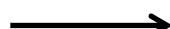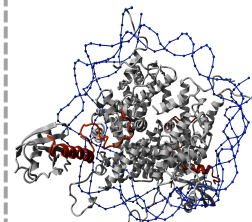

300-500 K, 50 ns

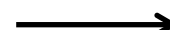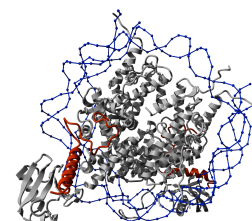

300-500 K, 50 ns

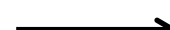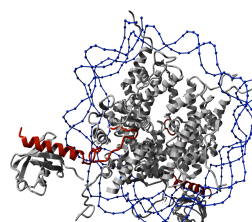

300-500 K, 50 ns

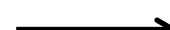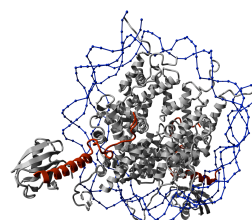

300-500 K, 50 ns

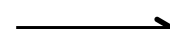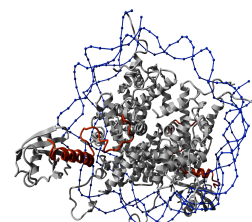

Supplement: supp [file elife-23872-supp-v1.zip]
