# Supplementary figures and images for: The RNF168 paralog RNF169 defines a new class of ubiquitylated histone reader involved in the response to DNA damage
Source: eLife journal article supplement (doi:10.7554/elife.23872), 2017-04-13

A

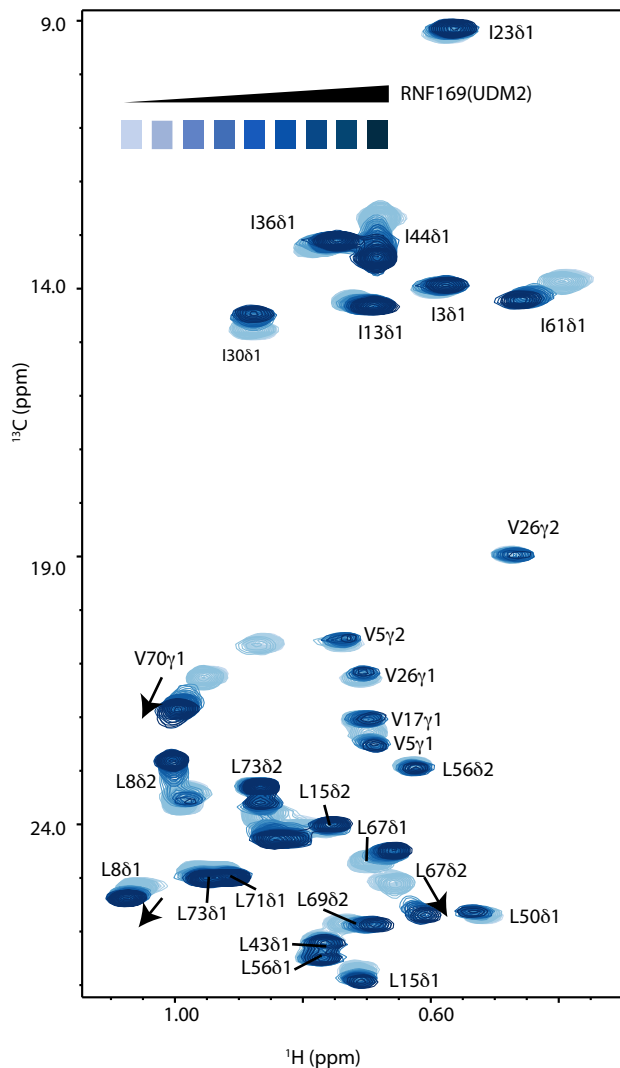

B

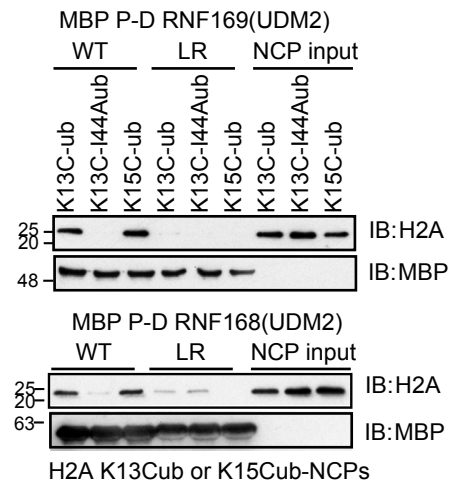

Supplement: supp [file elife-23872-supp-v1.zip]

**A****LRM2**

|        |     |             |            |     |
|--------|-----|-------------|------------|-----|
| RNF169 | 689 | RRKGSVDQYLL | LRSSNMAGAK | 708 |
| LANA   | 1   | MAPPGMRLR   | SGRSTGAP   | 17  |

**B**

free H2AK13Cub-NCP

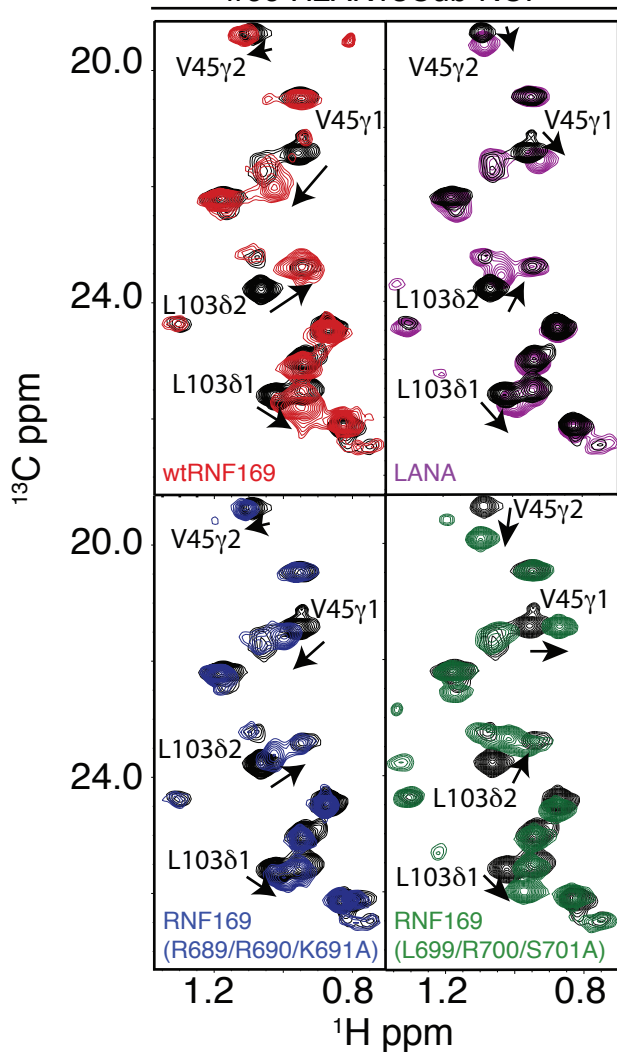

Supplement: supp [file elife-23872-supp-v1.zip]

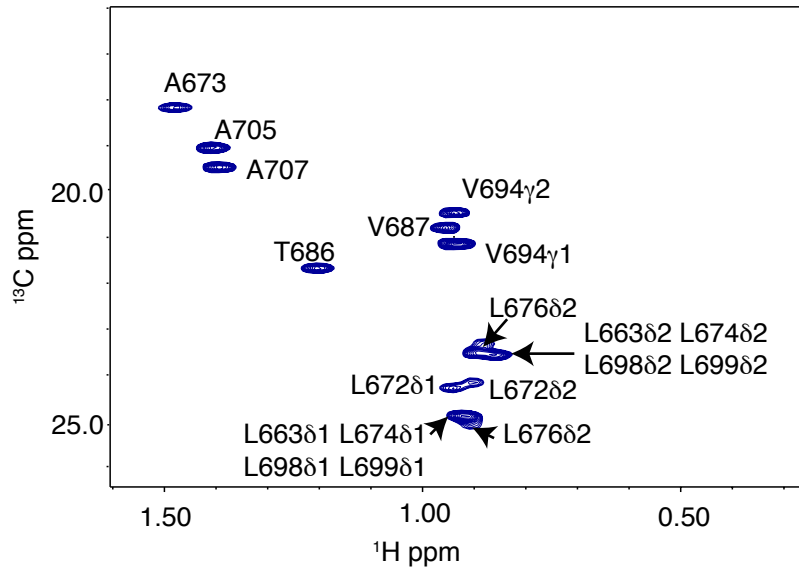

Supplement: supp [file elife-23872-supp-v1.zip]

**A**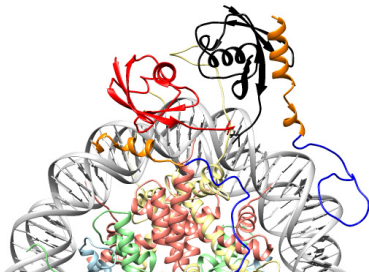**B**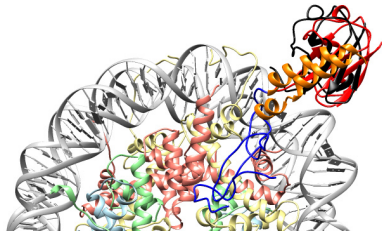

Supplement: supp [file elife-23872-supp-v1.zip]

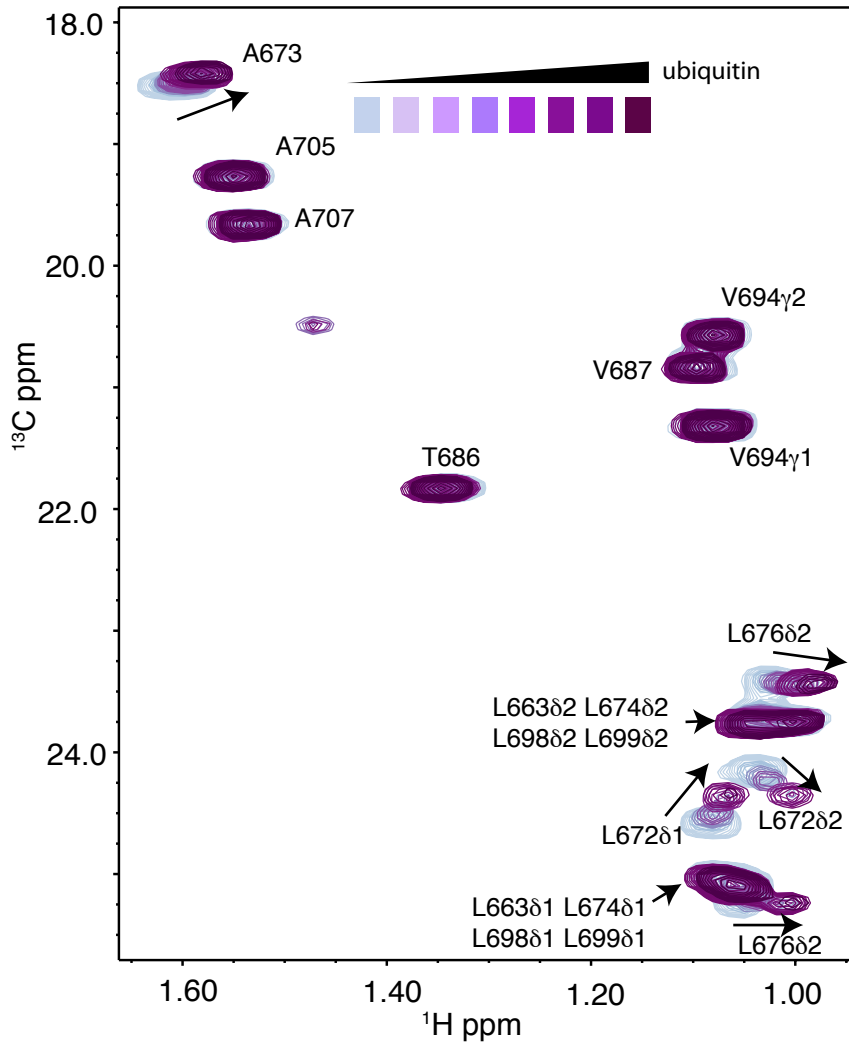

Supplement: supp [file elife-23872-supp-v1.zip]

**A**

665 **MIU2** 682 689 **LRM2** 701

DAAA-KLQ**QEEEDRQLALQLQRM**FDNERRTVS**RRKGSVDQYLLRSS**NMAGAK

**B**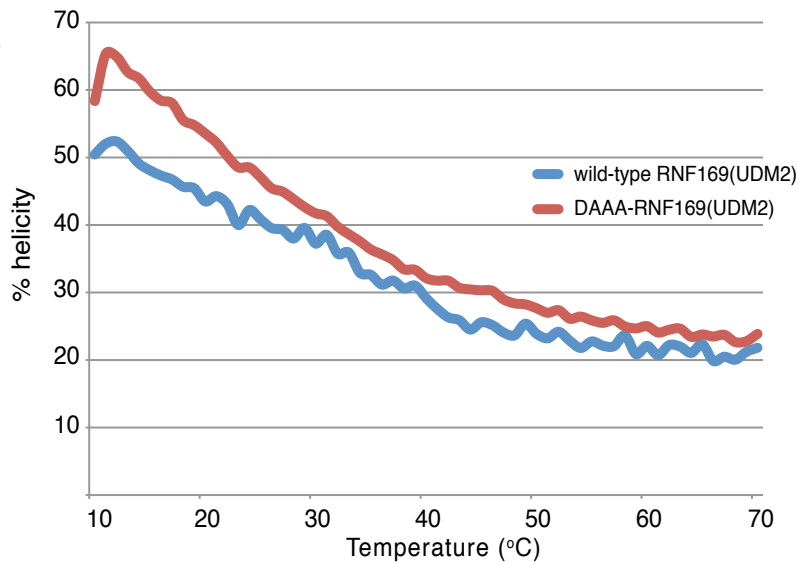

Supplement: supp [file elife-23872-supp-v1.zip]

**A**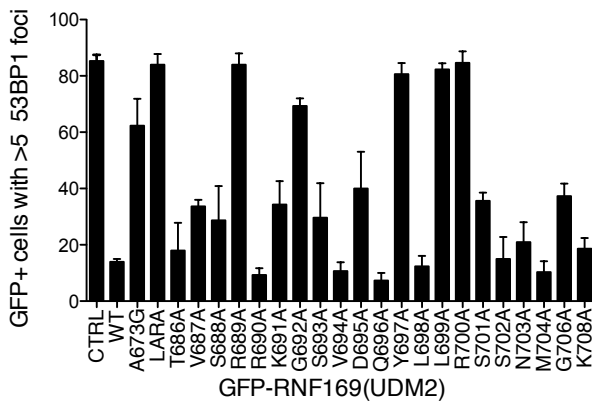**B**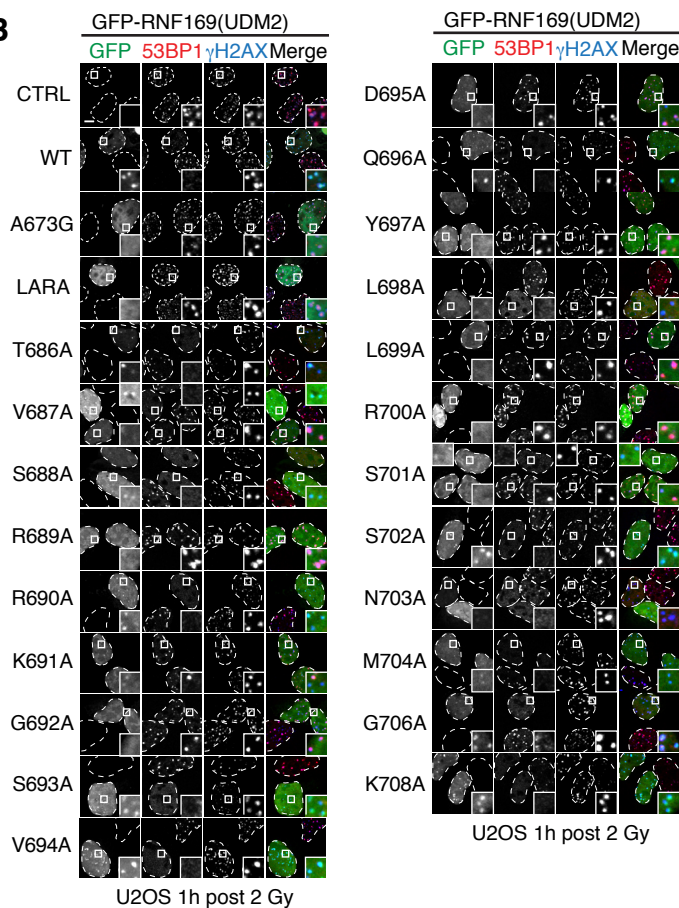

Supplement: supp [file elife-23872-supp-v1.zip]

**A**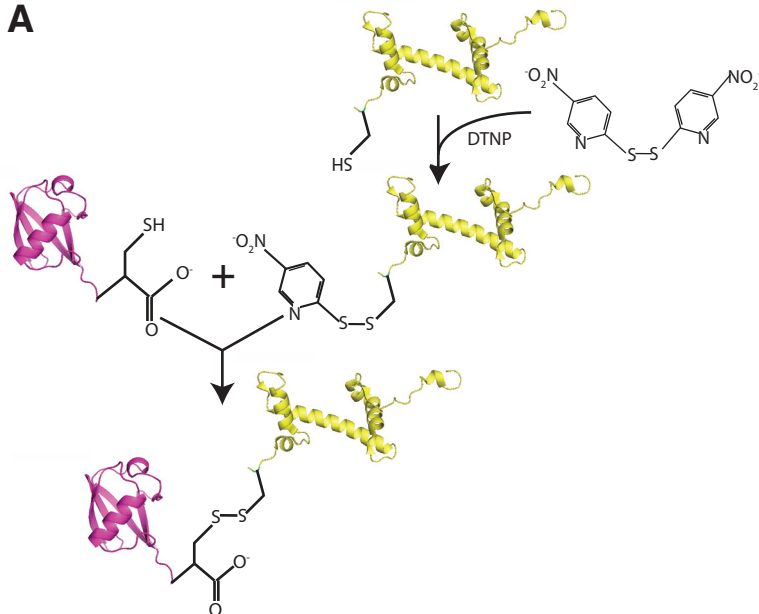**B**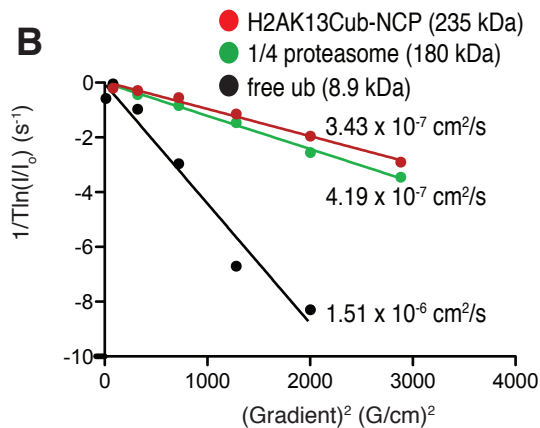**C**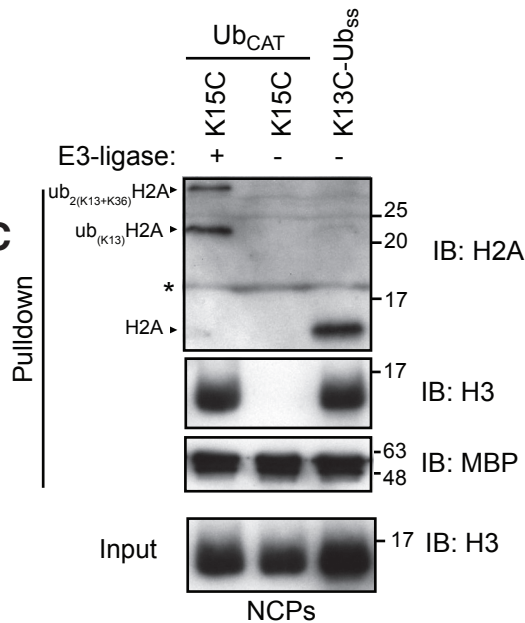

Supplement: supp [file elife-23872-supp-v1.zip]

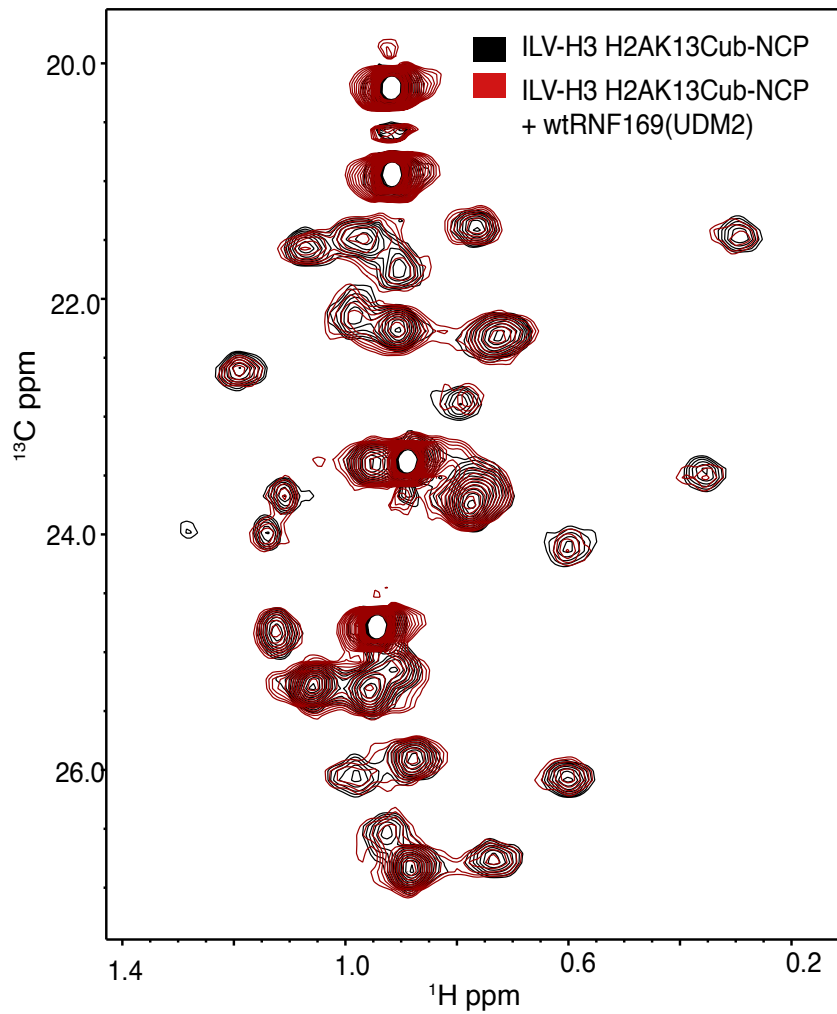

Supplement: supp [file elife-23872-supp-v1.zip]

**A**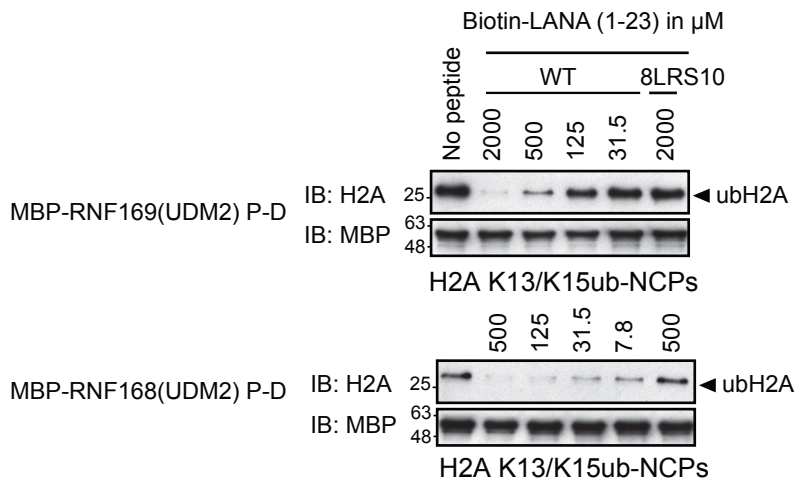**B**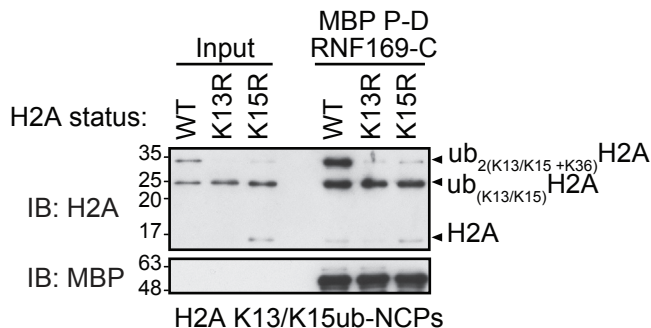

Supplement: supp [file elife-23872-supp-v1.zip]

A

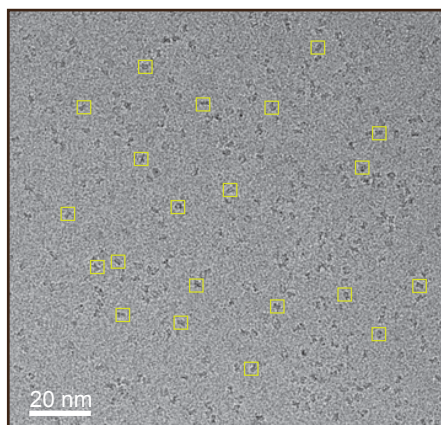

B

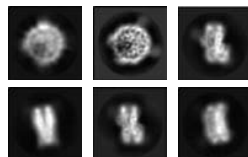

C

90 200 particles images

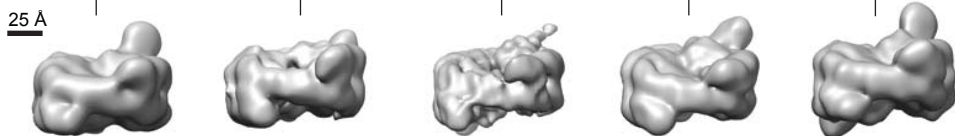

D

ubNCP

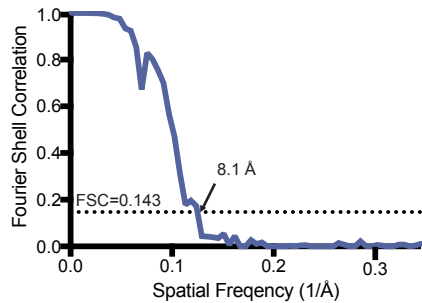

E

ubNCP-RNF169

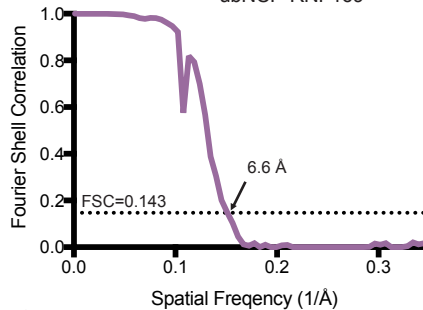

F

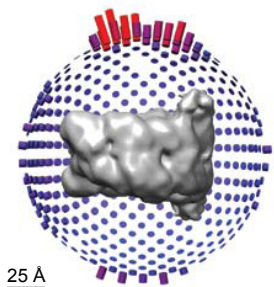

G

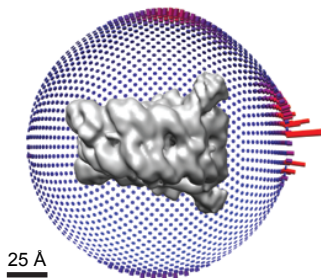

Supplement: supp [file elife-23872-supp-v1.zip]
